# Supplementary material for: High-throughput profiling of sequence recognition by tyrosine kinases and SH2 domains using bacterial peptide display
Source: eLife. 2023 Mar 16;12:e82345. doi: 10.7554/eLife.82345 (PMC10065799; doi:10.7554/eLife.82345)
Supplement: Figure 1—figure supplement 1—source data 1. [file elife-82345-fig1-figsupp1-data1.xlsx]

## Sheet: Sheet1
order	AA	-5	-4	-3	-2	-1	0	1	2	3	4	5
1	Y	8779	15927	5617	10733	6624	800896	11063	10129	11814	8603	14957
2	W	33468	29232	75960	53667	30871	9	26426	24256	23063	62469	59524
3	F	40713	26039	12478	17141	16764	736	16012	27990	30045	21315	22750
4	I	29589	15068	12943	18649	5553	133	42501	45385	13034	29318	16808
5	L	125560	70574	91544	93152	126228	655	52276	106984	100535	58098	107100
6	V	162844	82964	38626	24160	185975	2488	65366	86110	145396	35768	30867
7	M	74141	21961	63128	40292	22496	37	48479	40730	15633	34989	32642
8	P	16106	49524	38437	62591	28561	21	22629	35166	47501	25726	51929
9	G	50350	89168	54565	36457	68795	73	90550	74862	65791	76584	38873
10	A	44896	79015	33562	23762	82069	19	32826	40414	95485	24011	25759
11	T	23086	37808	73126	60133	17794	17	50300	51455	22999	45932	47245
12	S	68173	83695	74004	80335	56220	236	67596	70852	66177	101132	83396
13	C	12000	13911	11670	20432	7531	688	16813	19391	12387	39426	22015
14	N	6652	12597	5638	13608	2670	775	24730	18664	4715	11347	10767
15	Q	6585	15766	15930	27609	16621	4	14906	10291	16292	9543	34551
16	D	9917	27300	4918	5877	12330	2196	20848	16370	23887	7257	8592
17	E	27071	37753	17085	11685	57762	12	28582	15980	48291	10442	19238
18	H	2818	12539	3996	12678	4241	547	10843	10945	10247	7129	13001
19	R	37609	53006	133999	148357	31100	98	119354	81679	33359	178733	112942
20	K	14389	19925	26725	32520	11306	4	37224	15378	7652	14504	26382
21	stop	16140	17125	16946	17059	19386	1253	11573	7866	16594	8571	31559
